# Supplementary material for: Improving the performance of lead-free Cs2AgBiBr6 double perovskite solar cells by passivating Br vacancies
Source: Royal Society of Chemistry journal article supplement (doi:10.1039/d4tc02339k), 2024-01-01
Supplement: d4tc02339k1.pdf [file d4tc02339k1.pdf]

## Supplementary Information

### **Improving the Performance of Lead-Free Cs<sub>2</sub>AgBiBr<sub>6</sub> Double Perovskite Solar Cells by Passivating Br Vacancies**

Junjie Chen <sup>a</sup>, Xingyu Ma <sup>a</sup>, Li Gong <sup>\*a,b,c</sup>, Conghua Zhou <sup>d</sup>, Jianlin Chen <sup>e</sup>, Yangfan Lu <sup>c</sup>,

Maojun Zhou <sup>a</sup>, Haiping He <sup>\*b,c</sup>, and Zhizhen Ye <sup>\*b,c,f</sup>

<sup>a</sup> *School of Materials Science and Engineering, Changsha University of Science and Technology, Changsha 410114, China*

<sup>b</sup> *Wenzhou Key Laboratory of Novel Optoelectronic and Nano Materials and Engineering Research Centre of Zhejiang Province, Institute of Wenzhou, Zhejiang University, Wenzhou 325006, China*

<sup>c</sup> *School of Materials Science and Engineering, State Key Laboratory of Silicon and Advanced Semiconductor Materials, Zhejiang University, Hangzhou 310027, China*

<sup>d</sup> *Hunan Key Laboratory of Super-microstructure and Ultrafast Process, School of Physics and Electronics, Central South University, Changsha 410083, China*

<sup>e</sup> *School of Energy & Power Engineering, Changsha University of Science and Technology, Changsha 410114, China*

<sup>f</sup> *Shanxi-Zheda Institute of Advanced Materials and Chemical Engineering, Taiyuan 030001, China*

\*Corresponding authors.

*E-mail addresses:* gongli@csust.edu.cn (L. Gong), hphe@zju.edu.cn (H.-P. He),  
yezz@zju.edu.cn (Z.-Z. Ye)

## Experimental section

**Chemicals.** Cesium bromide (CsBr, 99.999%), dimethyl sulfoxide (DMSO, anhydrous,  $\geq 99.9\%$ ), titanium diisopropoxide bis (acetylacetonate) (75 wt.% in isopropanol), hydrochloric acid (37 wt.% in water), hydroiodic acid (57 wt.% in water) and anhydrous ethanol were purchased from Sigma-Aldrich. Isopropanol Alcohol (anhydrous,  $\geq 99.5\%$ ), hydrobromic acid (48 wt.% in water), and methanol were purchased from aladdin. Silver bromide (AgBr, 99.998%), bismuth (III) bromide (BiBr<sub>3</sub>, 99%), titanium (IV) chloride (TiCl<sub>4</sub>, 99.0%) were purchased from Alfa Aesar. Conductive carbon paste was purchased from Shanghai MaterWin New Materials Co., Ltd., China. All reagents were used without further purification.

**Device Fabrication.** The glass/FTO substrate was cleaned sequentially with glass cleaner, acetone, methanol-ethanol-isopropanol solvent mixture, and anhydrous ethanol for 30 min. And then the cleaned substrate was treated with UV/ozone for 15-25 min.

The compact TiO<sub>2</sub> (c-TiO<sub>2</sub>) precursor solution was prepared by mixing titanium diisopropoxide bis (acetylacetonate) and anhydrous ethanol at a volume ratio of 1:19. The precursor solution was spin-coated on the substrate at 2500 rpm for 30 s, and then annealed at 120 °C for 3 min. Then it was annealed at 500 °C for 30 min in a muffle furnace to obtain the FTO/c-TiO<sub>2</sub> substrate. The 420  $\mu$ L TiCl<sub>4</sub> was dissolved in 100 mL deionized water to obtain the TiCl<sub>4</sub> solution. The FTO/c-TiO<sub>2</sub> substrate was treated with the TiCl<sub>4</sub> solution at 70 °C for 30 min and then annealed at 500 °C for 30 min in a muffle furnace.

In the glove box, 1 mmol CsBr, 0.5 mmol AgBr, and 0.5 mmol BiBr<sub>3</sub> were mixed in 1 mL DMSO and stirred at 70 °C for 12 h to obtain Cs<sub>2</sub>AgBiBr<sub>6</sub> perovskite precursor solution. The precursor solution was spin-coated on the FTO/TiO<sub>2</sub> substrate at 1000 rpm for 10 s and 5000 rpm for 30 s, respectively. And then the Cs<sub>2</sub>AgBiBr<sub>6</sub> precursor film was annealed at 275 °C for 5 min. The FTO/TiO<sub>2</sub>/Cs<sub>2</sub>AgBiBr<sub>6</sub>/C device was fabricated by doctor-blading the

carbon electrode on the perovskite layer and annealing it at 120 °C for 10 min. Halogenated acid with different volume ratios (1%, 2%, 3%, 4%, 5%) was added to the Cs<sub>2</sub>AgBiBr<sub>6</sub> perovskite precursor solution. The other processes are the same.

**Characterizations.** The PCE of the PSC was measured at one sun illumination of AM 1.5G (100 mW cm<sup>-2</sup>) by a solar simulator (Oriel Sol 3A class) equipped with a Xenon lamp (Newport 91,160) and a Keithley 2400 source meter. The active area of the PSC is 0.09 cm<sup>2</sup>. TPC and TPV measurements were performed by using transient surface photovoltage spectroscopy (DSO-X 3104, Agilent). The EQE of the device was measured through the direct current (DC) mode of the spectrum performance testing system (7-SCSpec). An X-ray diffraction instrument (D8-Advance) equipped with Cu K<sub>α</sub> radiation ( $\lambda = 0.1541$  nm) was used to complete the XRD measurement of the perovskite film. The distribution of elements in films was tested by EDX. The elemental composition of the Cs<sub>2</sub>AgBiBr<sub>6</sub> film was analyzed using XPS (Thermo Fly ESCALAB 250 xi) under an Al K<sub>α</sub> (1486.6 eV) light source. The Raman spectra of the sample were obtained by excitation of the film at a wavelength of 785 nm on the HORIBA evolutionary Raman spectrometer. The surface and cross-sectional morphologies of films were characterized by SEM (JSM-7900F). TEM was done by using the field-emission source at 200 kV and the microscope (FEI Tecnai F20). The optical absorption properties of Cs<sub>2</sub>AgBiBr<sub>6</sub> perovskite films were tested by UV-Vis (UV3600-plus, Shimadzu).

**Theoretical Calculation.** DFT calculations were performed using the Vienna Ab initio simulation package (VASP).<sup>1,2</sup> The exchange-correlation functional is the optimized version of the Perdew-Burke-Ernzerhof formulation for solids (PBEsol).<sup>3</sup> The pydefect package was used for modeling the point defects and analyzing the calculation results.<sup>4</sup> Supercell of 320 atoms was used for the defect calculations. Monkhorst-Pack  $2 \times 2 \times 2$  *k*-point grid was used for the reciprocal space sampling. The residual forces on atoms were reduced to be less than 0.01 eV Å<sup>-1</sup>. Defect formation enthalpies were calculated as:

$$E_f[V^q] = \{E[V^q] + E_{corr}[V^q]\} - E_{Perf} - \sum n_i \mu_i + q(\varepsilon_{VBM} + \Delta\varepsilon_F)$$

where  $E[V^q]$  and  $E_{\text{perf}}$  are the total energies of the supercell with vacancy V in charge state q and the perfect crystal supercell, respectively.  $E_{\text{corr}}[V^q]$  is the correcting energy for the finite-size error of the defect supercell.  $n_i$  is the number of removed i-type atoms, and  $\mu_i$  refers to its chemical potential depending on the growth condition.  $\epsilon_{\text{VBM}}$  is the energy level of the VBM in the perfect crystal, and  $\Delta\epsilon_F$  represents the Fermi level with respect to  $\epsilon_{\text{VBM}}$ . Band structure of supercells are unfolded into the first Brillium Zone of primitive cell using VaspBandUnfolding package.<sup>5</sup>

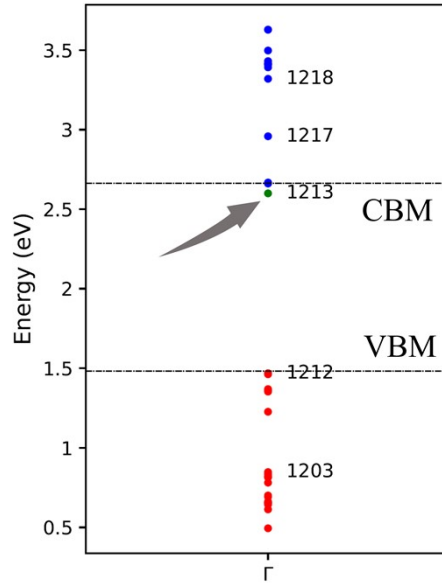

**Fig. S1.** Identification results for neutral  $V_{Br}$  eigenvalues.

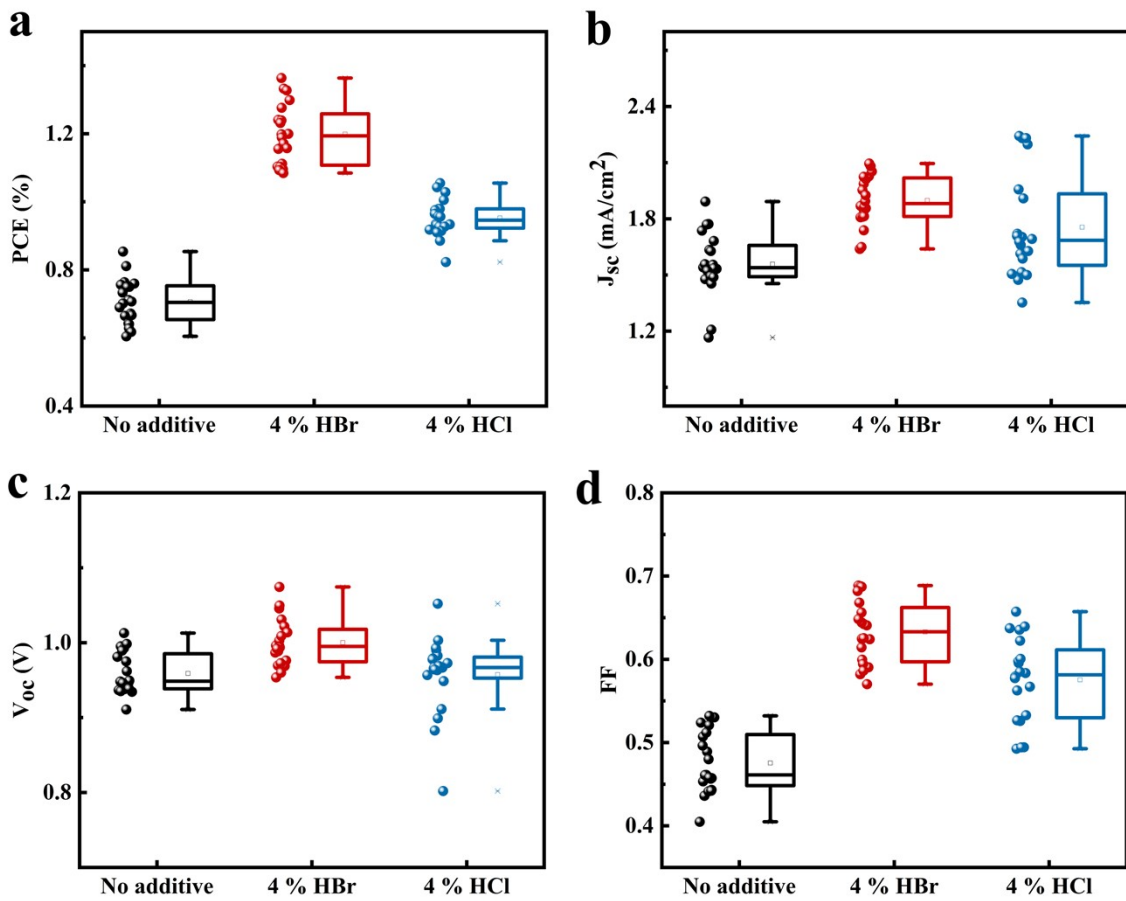

**Fig. S2.** The distribution of the performance for control, 4 % HCl- $Cs_2AgBiBr_6$ , 4 % HBr- $Cs_2AgBiBr_6$  PSCs (a) PCE, (b)  $J_{sc}$ , (c)  $V_{oc}$ , (d)  $FF$ .

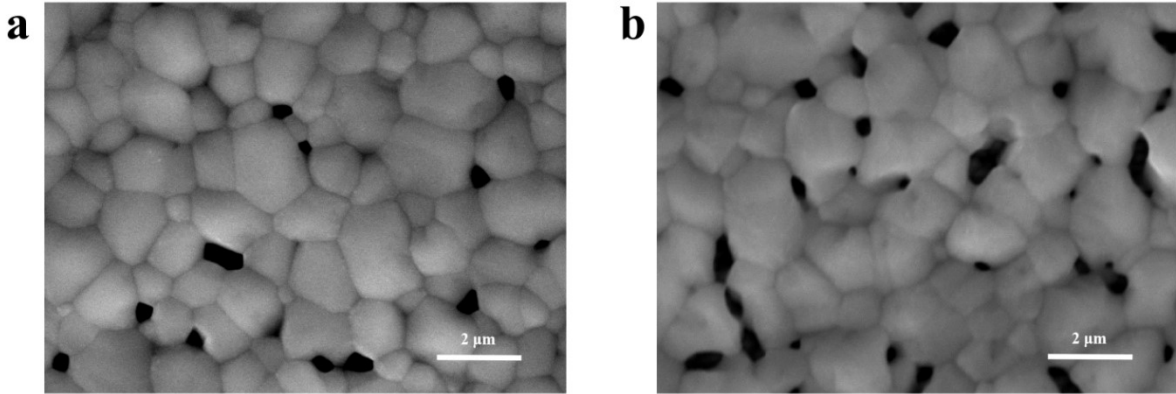

**Fig. S3.** SEM images of (a) control, (b) 2 % HI-Cs<sub>2</sub>AgBiBr<sub>6</sub> films.

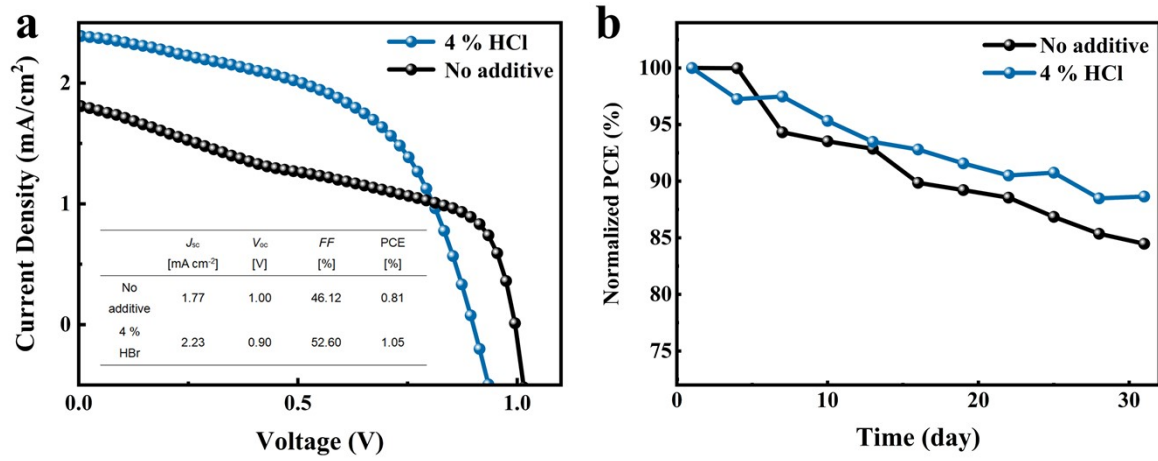

**Fig. S4.** (a)  $J$ - $V$  curves and (b) stability of control and 4 % HCl-Cs<sub>2</sub>AgBiBr<sub>6</sub> PSCs (champion).

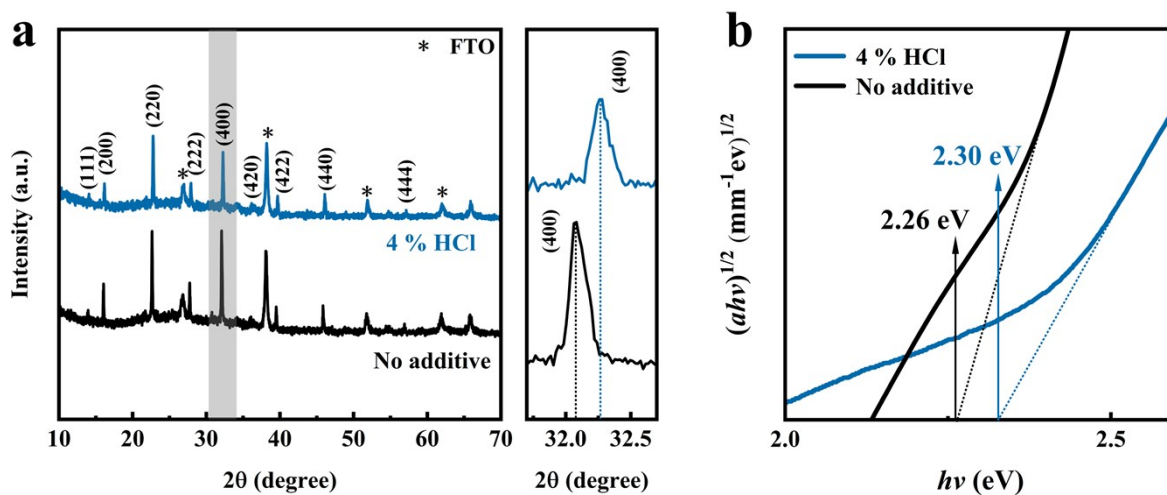

**Fig. S5.** (a) XRD patterns and the enlargement of (400) of control and 4 % HCl- $\text{Cs}_2\text{AgBiBr}_6$  films. (b) The Tauc plot of 4 % HCl- $\text{Cs}_2\text{AgBiBr}_6$  films.

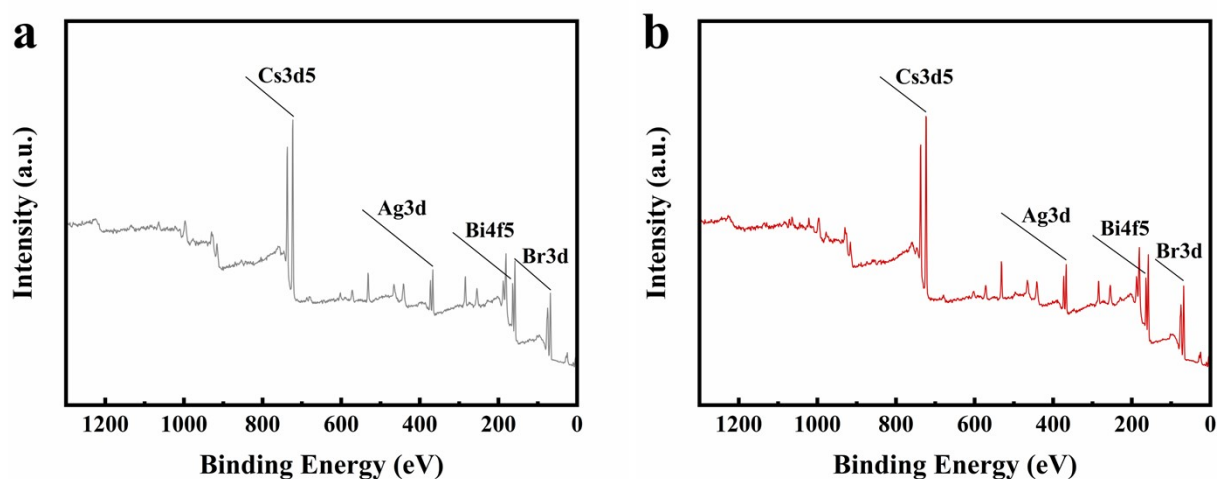

**Fig. S6.** The XPS full-spectrum of (a) control and (b) 4 % HBr- $\text{Cs}_2\text{AgBiBr}_6$  films.

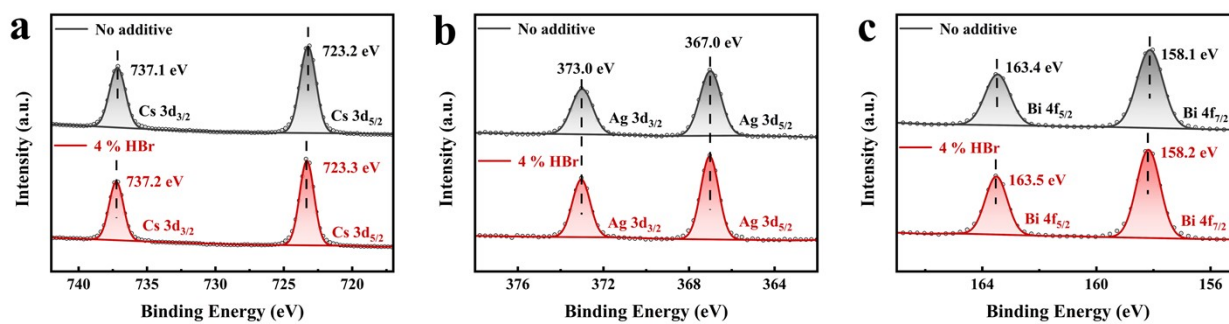

**Fig. S7.** High-resolution XPS spectra of (a) Cs 3d, (b) Ag 3d, and (c) Bi 4f of control and 4 % HBr-Cs<sub>2</sub>AgBiBr<sub>6</sub> films.

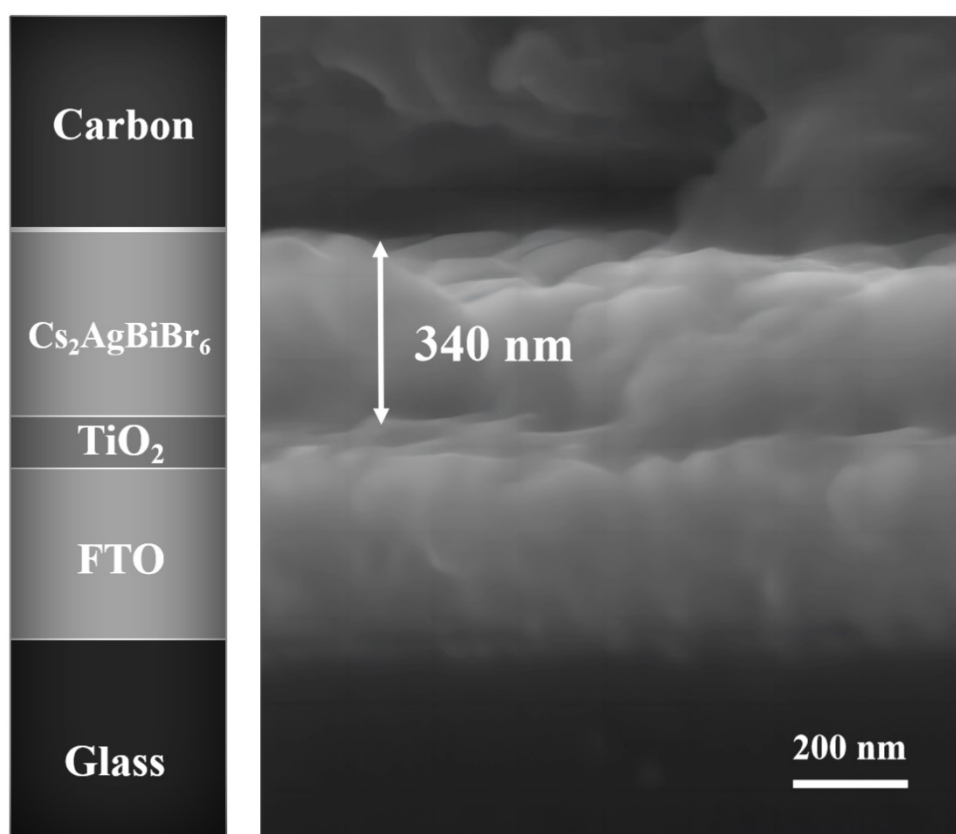

**Fig. S8.** The cross-section SEM image of PSC.



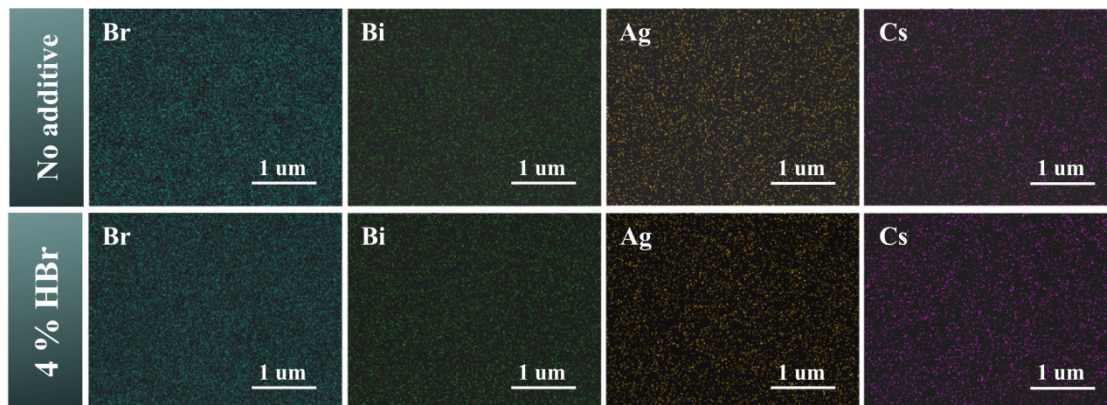

**Fig. S9.** EDX element mappings of control and 4 % HBr- $\text{Cs}_2\text{AgBiBr}_6$  films.

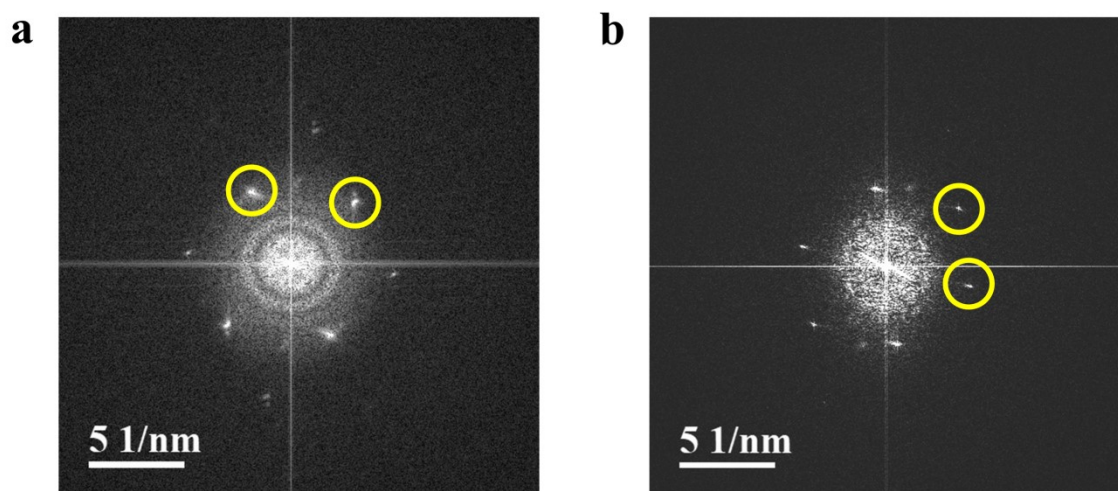

**Fig. S10.** Diffraction spots in the yellow boxes in the FFT images of (a) control and (b) 4 % HBr- $\text{Cs}_2\text{AgBiBr}_6$  are used for geometric phase analysis.

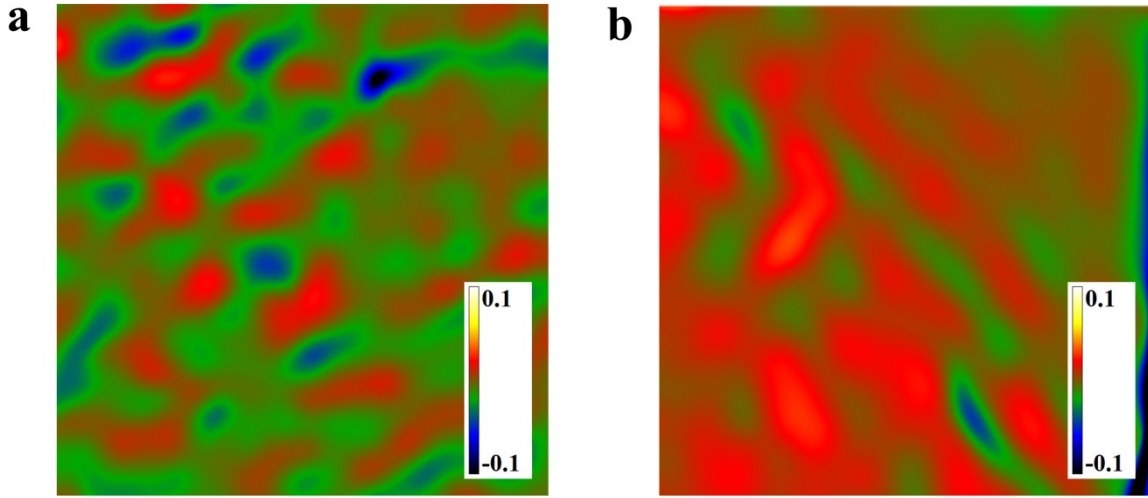

**Fig. S11.** Mean dilatation ( $D_{xy}$ ) component of (a) control and (b) 4 % HBr- $\text{Cs}_2\text{AgBiBr}_6$ .

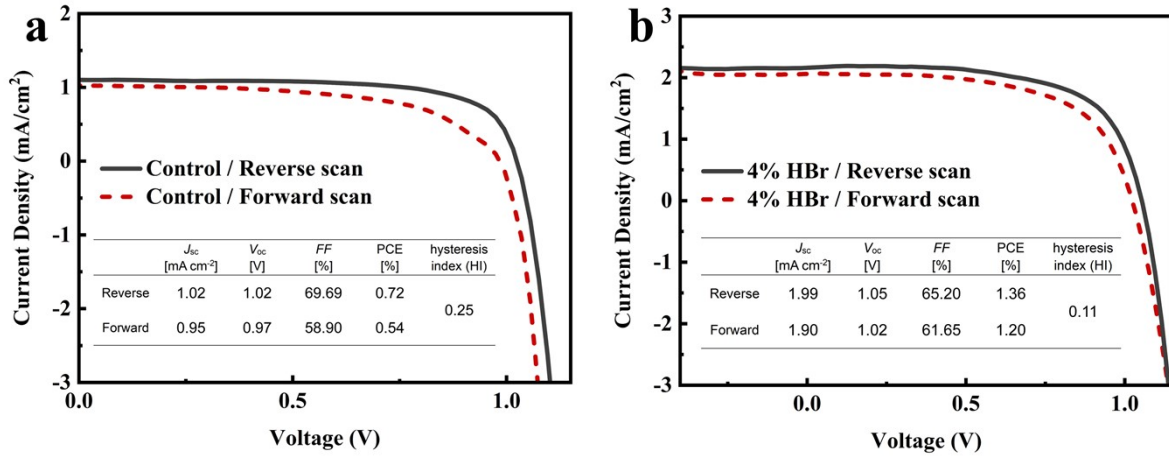

**Fig. S12.**  $J$ - $V$  curves of (a) control and (b) 4% HBr- $\text{Cs}_2\text{AgBiBr}_6$  PSCs measured under reverse scan and forward scan directions. The hysteresis index is defined as  $(\text{PCE}_{\text{Reverse}} - \text{PCE}_{\text{Forward}}) / \text{PCE}_{\text{Reverse}}$ .<sup>6</sup>

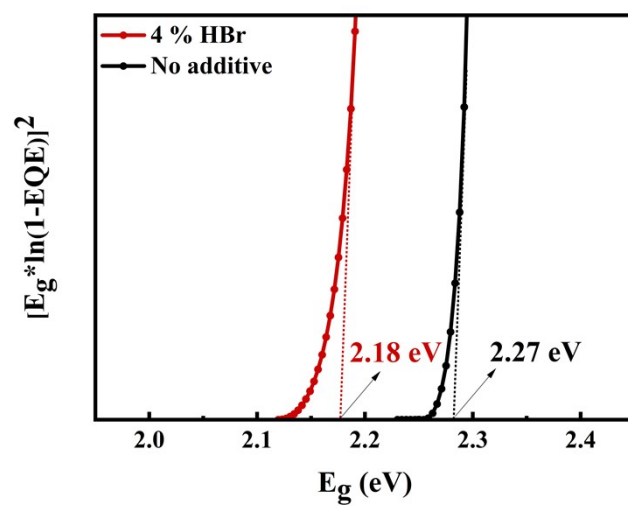

**Fig. S13.** The bandgap of control and 4 % HBr- $\text{Cs}_2\text{AgBiBr}_6$  PSCs as calculated by the EQE.

**Table S1.** Performance parameters of control PSCs.

| No. | $J_{sc}$ [mA cm <sup>-2</sup> ] | $V_{oc}$ [V] | $FF$ [%] | PCE [%] | No. | $J_{sc}$ [mA cm <sup>-2</sup> ] | $V_{oc}$ [V] | $FF$ [%] | PCE [%] |
|-----|---------------------------------|--------------|----------|---------|-----|---------------------------------|--------------|----------|---------|
| 1   | 1.77                            | 0.99         | 46.12    | 0.81    | 11  | 1.48                            | 0.94         | 50.73    | 0.70    |
| 2   | 1.77                            | 0.99         | 43.61    | 0.76    | 12  | 1.74                            | 0.98         | 40.49    | 0.69    |
| 3   | 1.53                            | 0.93         | 53.03    | 0.76    | 13  | 1.55                            | 0.95         | 45.66    | 0.67    |
| 4   | 1.54                            | 0.94         | 52.40    | 0.76    | 14  | 1.54                            | 0.95         | 45.73    | 0.67    |
| 5   | 1.50                            | 0.94         | 53.20    | 0.75    | 15  | 1.52                            | 0.95         | 46.11    | 0.66    |
| 6   | 1.63                            | 0.94         | 48.92    | 0.75    | 16  | 1.49                            | 0.98         | 44.15    | 0.64    |
| 7   | 1.56                            | 0.95         | 49.65    | 0.73    | 17  | 1.45                            | 0.96         | 45.81    | 0.64    |
| 8   | 1.63                            | 0.91         | 48.00    | 0.71    | 18  | 1.21                            | 1.00         | 52.10    | 0.63    |
| 9   | 1.68                            | 0.95         | 44.33    | 0.71    | 19  | 1.49                            | 0.94         | 44.22    | 0.62    |
| 10  | 1.12                            | 1.03         | 60.53    | 0.70    | 20  | 1.17                            | 1.01         | 51.21    | 0.60    |

**Table S2.** Performance parameters of 1 % HCl-Cs<sub>2</sub>AgBiBr<sub>6</sub> PSCs.

| No. | $J_{sc}$ [mA cm <sup>-2</sup> ] | $V_{oc}$ [V] | $FF$ [%] | PCE [%] | No. | $J_{sc}$ [mA cm <sup>-2</sup> ] | $V_{oc}$ [V] | $FF$ [%] | PCE [%] |
|-----|---------------------------------|--------------|----------|---------|-----|---------------------------------|--------------|----------|---------|
| 1   | 1.51                            | 0.96         | 59.64    | 0.87    | 11  | 1.30                            | 0.96         | 56.91    | 0.71    |
| 2   | 1.32                            | 0.99         | 64.13    | 0.84    | 12  | 1.26                            | 0.97         | 58.17    | 0.71    |
| 3   | 1.49                            | 0.95         | 56.76    | 0.80    | 13  | 1.30                            | 0.97         | 56.25    | 0.70    |
| 4   | 1.41                            | 0.97         | 58.37    | 0.79    | 14  | 1.36                            | 0.95         | 53.20    | 0.68    |
| 5   | 1.44                            | 0.94         | 55.79    | 0.75    | 15  | 1.13                            | 1.01         | 59.03    | 0.67    |
| 6   | 1.34                            | 0.93         | 60.31    | 0.75    | 16  | 1.24                            | 0.93         | 55.61    | 0.64    |
| 7   | 1.47                            | 0.94         | 53.98    | 0.75    | 17  | 1.22                            | 0.95         | 55.21    | 0.64    |
| 8   | 1.34                            | 0.93         | 59.21    | 0.74    | 18  | 1.34                            | 0.93         | 49.81    | 0.62    |
| 9   | 1.38                            | 0.96         | 55.53    | 0.74    | 19  | 1.23                            | 0.92         | 53.94    | 0.61    |
| 10  | 1.26                            | 0.99         | 58.07    | 0.72    | 20  | 1.46                            | 0.91         | 45.62    | 0.61    |

**Table S3.** Performance parameters of 2 % HCl-Cs<sub>2</sub>AgBiBr<sub>6</sub> PSCs.

| No. | $J_{sc}$ [mA cm <sup>-2</sup> ] | $V_{oc}$ [V] | $FF$ [%] | PCE [%] | No. | $J_{sc}$ [mA cm <sup>-2</sup> ] | $V_{oc}$ [V] | $FF$ [%] | PCE [%] |
|-----|---------------------------------|--------------|----------|---------|-----|---------------------------------|--------------|----------|---------|
| 1   | 1.43                            | 0.94         | 60.32    | 0.82    | 11  | 1.36                            | 0.96         | 58.82    | 0.76    |
| 2   | 1.45                            | 0.95         | 59.05    | 0.81    | 12  | 1.35                            | 0.96         | 57.77    | 0.75    |
| 3   | 1.42                            | 0.94         | 60.17    | 0.80    | 13  | 1.32                            | 0.97         | 58.53    | 0.75    |
| 4   | 1.37                            | 0.96         | 59.97    | 0.79    | 14  | 1.40                            | 0.95         | 56.40    | 0.75    |
| 5   | 1.40                            | 0.95         | 58.90    | 0.78    | 15  | 1.32                            | 0.96         | 58.98    | 0.74    |
| 6   | 1.34                            | 0.97         | 60.29    | 0.78    | 16  | 1.42                            | 0.95         | 54.04    | 0.73    |
| 7   | 1.35                            | 0.96         | 59.72    | 0.78    | 17  | 1.34                            | 0.97         | 54.96    | 0.71    |
| 8   | 1.37                            | 0.96         | 58.60    | 0.78    | 18  | 1.31                            | 0.97         | 53.25    | 0.68    |
| 9   | 1.39                            | 0.95         | 58.62    | 0.77    | 19  | 1.24                            | 0.97         | 55.36    | 0.66    |
| 10  | 1.36                            | 0.96         | 59.00    | 0.77    | 20  | 1.23                            | 0.92         | 55.93    | 0.63    |

**Table S4.** Performance parameters of 3 % HCl-Cs<sub>2</sub>AgBiBr<sub>6</sub> PSCs.

| No. | $J_{sc}$ [mA cm <sup>-2</sup> ] | $V_{oc}$ [V] | $FF$ [%] | PCE [%] | No. | $J_{sc}$ [mA cm <sup>-2</sup> ] | $V_{oc}$ [V] | $FF$ [%] | PCE [%] |
|-----|---------------------------------|--------------|----------|---------|-----|---------------------------------|--------------|----------|---------|
| 1   | 1.70                            | 0.97         | 59.25    | 0.98    | 11  | 1.86                            | 0.91         | 47.94    | 0.81    |
| 2   | 2.50                            | 0.94         | 39.03    | 0.91    | 12  | 2.02                            | 0.96         | 41.11    | 0.80    |
| 3   | 2.29                            | 0.93         | 42.08    | 0.89    | 13  | 2.13                            | 0.84         | 42.89    | 0.76    |
| 4   | 2.39                            | 0.92         | 39.65    | 0.88    | 14  | 1.91                            | 0.98         | 40.67    | 0.76    |
| 5   | 2.47                            | 0.92         | 38.06    | 0.87    | 15  | 2.13                            | 0.84         | 42.04    | 0.75    |
| 6   | 2.20                            | 0.86         | 45.50    | 0.86    | 16  | 2.07                            | 0.85         | 42.30    | 0.74    |
| 7   | 2.10                            | 0.88         | 45.49    | 0.85    | 17  | 1.93                            | 0.97         | 39.73    | 0.74    |
| 8   | 2.31                            | 0.92         | 39.34    | 0.84    | 18  | 1.77                            | 1.00         | 40.21    | 0.71    |
| 9   | 2.18                            | 0.69         | 54.75    | 0.82    | 19  | 1.96                            | 1.04         | 34.34    | 0.70    |
| 10  | 2.16                            | 0.69         | 54.94    | 0.81    | 20  | 2.13                            | 1.02         | 31.75    | 0.69    |

**Table S5.** Performance parameters of 4 % HCl-Cs<sub>2</sub>AgBiBr<sub>6</sub> PSCs.

| No. | $J_{sc}$ [mA cm <sup>-2</sup> ] | $V_{oc}$ [V] | $FF$ [%] | PCE [%] | No. | $J_{sc}$ [mA cm <sup>-2</sup> ] | $V_{oc}$ [V] | $FF$ [%] | PCE [%] |
|-----|---------------------------------|--------------|----------|---------|-----|---------------------------------|--------------|----------|---------|
| 1   | 2.23                            | 0.90         | 52.60    | 1.05    | 11  | 1.47                            | 0.97         | 65.72    | 0.94    |
| 2   | 2.24                            | 0.88         | 52.67    | 1.04    | 12  | 1.69                            | 0.97         | 56.71    | 0.93    |
| 3   | 2.20                            | 0.80         | 58.35    | 1.03    | 13  | 1.96                            | 0.97         | 49.27    | 0.93    |
| 4   | 2.23                            | 0.91         | 49.44    | 1.01    | 14  | 1.52                            | 0.96         | 63.54    | 0.93    |
| 5   | 1.66                            | 0.99         | 59.56    | 0.98    | 15  | 1.50                            | 0.97         | 63.94    | 0.93    |
| 6   | 1.70                            | 0.98         | 58.51    | 0.98    | 16  | 1.51                            | 0.96         | 63.74    | 0.92    |
| 7   | 1.72                            | 0.98         | 57.94    | 0.98    | 17  | 1.91                            | 0.97         | 49.43    | 0.91    |
| 8   | 1.71                            | 0.98         | 57.75    | 0.96    | 18  | 1.68                            | 0.96         | 56.26    | 0.91    |
| 9   | 1.61                            | 0.99         | 59.76    | 0.96    | 19  | 1.35                            | 1.05         | 62.24    | 0.89    |
| 10  | 1.59                            | 1.00         | 60.06    | 0.96    | 20  | 1.63                            | 0.95         | 53.29    | 0.82    |

**Table S6.** Performance parameters of 5 % HCl-Cs<sub>2</sub>AgBiBr<sub>6</sub> PSCs.

| No. | $J_{sc}$ [mA cm <sup>-2</sup> ] | $V_{oc}$ [V] | $FF$ [%] | PCE [%] | No. | $J_{sc}$ [mA cm <sup>-2</sup> ] | $V_{oc}$ [V] | $FF$ [%] | PCE [%] |
|-----|---------------------------------|--------------|----------|---------|-----|---------------------------------|--------------|----------|---------|
| 1   | 1.71                            | 1.03         | 51.39    | 0.90    | 11  | 1.60                            | 1.01         | 50.84    | 0.82    |
| 2   | 1.48                            | 0.95         | 63.73    | 0.90    | 12  | 1.49                            | 0.92         | 59.39    | 0.81    |
| 3   | 1.52                            | 0.95         | 61.97    | 0.89    | 13  | 1.57                            | 1.00         | 51.42    | 0.81    |
| 4   | 1.76                            | 1.02         | 49.35    | 0.88    | 14  | 1.56                            | 1.01         | 50.48    | 0.80    |
| 5   | 1.49                            | 0.94         | 62.50    | 0.88    | 15  | 1.60                            | 1.01         | 48.46    | 0.78    |
| 6   | 1.53                            | 0.92         | 60.74    | 0.86    | 16  | 1.52                            | 1.01         | 49.63    | 0.76    |
| 7   | 1.51                            | 0.93         | 59.95    | 0.84    | 17  | 1.50                            | 1.01         | 47.77    | 0.72    |
| 8   | 1.88                            | 1.01         | 44.37    | 0.84    | 18  | 1.47                            | 1.05         | 44.67    | 0.69    |
| 9   | 1.51                            | 0.93         | 59.86    | 0.84    | 19  | 2.03                            | 0.91         | 45.70    | 0.84    |
| 10  | 1.46                            | 0.93         | 61.49    | 0.83    | 20  | 2.07                            | 0.90         | 44.70    | 0.83    |

**Table S7.** Performance parameters of 1 % HBr-Cs<sub>2</sub>AgBiBr<sub>6</sub> PSCs.

| No. | $J_{sc}$ [mA cm <sup>-2</sup> ] | $V_{oc}$ [V] | $FF$ [%] | PCE [%] | No. | $J_{sc}$ [mA cm <sup>-2</sup> ] | $V_{oc}$ [V] | $FF$ [%] | PCE [%] |
|-----|---------------------------------|--------------|----------|---------|-----|---------------------------------|--------------|----------|---------|
| 1   | 1.73                            | 0.93         | 52.40    | 0.85    | 11  | 1.73                            | 0.89         | 52.01    | 0.80    |
| 2   | 1.53                            | 0.89         | 61.83    | 0.84    | 12  | 1.42                            | 0.90         | 62.47    | 0.80    |
| 3   | 2.01                            | 0.92         | 44.95    | 0.83    | 13  | 1.90                            | 0.93         | 44.72    | 0.79    |
| 4   | 1.76                            | 0.91         | 52.16    | 0.83    | 14  | 1.47                            | 0.89         | 60.30    | 0.78    |
| 5   | 1.69                            | 0.93         | 52.40    | 0.83    | 15  | 1.45                            | 0.89         | 60.56    | 0.78    |
| 6   | 1.94                            | 0.93         | 45.20    | 0.82    | 16  | 1.35                            | 0.91         | 61.47    | 0.75    |
| 7   | 1.43                            | 0.88         | 60.99    | 0.77    | 17  | 1.31                            | 0.90         | 60.91    | 0.72    |
| 8   | 1.40                            | 0.90         | 63.38    | 0.80    | 18  | 1.30                            | 0.89         | 61.56    | 0.72    |
| 9   | 1.40                            | 0.90         | 63.67    | 0.80    | 19  | 1.39                            | 0.91         | 55.83    | 0.71    |
| 10  | 1.81                            | 0.94         | 46.69    | 0.80    | 20  | 1.32                            | 0.89         | 59.60    | 0.70    |

**Table S8.** Performance parameters of 2 % HBr-Cs<sub>2</sub>AgBiBr<sub>6</sub> PSCs.

| No. | $J_{sc}$ [mA cm <sup>-2</sup> ] | $V_{oc}$ [V] | $FF$ [%] | PCE [%] | No. | $J_{sc}$ [mA cm <sup>-2</sup> ] | $V_{oc}$ [V] | $FF$ [%] | PCE [%] |
|-----|---------------------------------|--------------|----------|---------|-----|---------------------------------|--------------|----------|---------|
| 1   | 2.37                            | 0.94         | 48.98    | 1.09    | 11  | 2.14                            | 0.74         | 55.90    | 0.89    |
| 2   | 2.28                            | 0.97         | 49.30    | 1.09    | 12  | 1.42                            | 0.96         | 64.32    | 0.88    |
| 3   | 2.16                            | 0.98         | 50.13    | 1.06    | 13  | 1.47                            | 0.96         | 61.54    | 0.86    |
| 4   | 2.00                            | 1.00         | 52.13    | 1.04    | 14  | 1.38                            | 0.97         | 64.63    | 0.86    |
| 5   | 2.30                            | 0.88         | 51.03    | 1.03    | 15  | 1.71                            | 0.99         | 50.86    | 0.86    |
| 6   | 2.25                            | 0.89         | 51.69    | 1.03    | 16  | 1.80                            | 0.93         | 50.33    | 0.84    |
| 7   | 2.29                            | 0.96         | 44.24    | 0.97    | 17  | 1.58                            | 1.00         | 52.60    | 0.83    |
| 8   | 1.85                            | 1.03         | 50.79    | 0.96    | 18  | 1.44                            | 0.90         | 63.48    | 0.82    |
| 9   | 1.51                            | 0.96         | 63.55    | 0.92    | 19  | 1.47                            | 1.04         | 52.92    | 0.81    |
| 10  | 1.51                            | 0.96         | 61.91    | 0.90    | 20  | 1.81                            | 0.90         | 47.76    | 0.78    |

**Table S9.** Performance parameters of 3 % HBr-Cs<sub>2</sub>AgBiBr<sub>6</sub> PSCs.

| No. | $J_{sc}$ [mA cm <sup>-2</sup> ] | $V_{oc}$ [V] | $FF$ [%] | PCE [%] | No. | $J_{sc}$ [mA cm <sup>-2</sup> ] | $V_{oc}$ [V] | $FF$ [%] | PCE [%] |
|-----|---------------------------------|--------------|----------|---------|-----|---------------------------------|--------------|----------|---------|
| 1   | 2.00                            | 0.98         | 62.09    | 1.22    | 11  | 1.98                            | 0.95         | 59.29    | 1.12    |
| 2   | 2.02                            | 0.98         | 61.11    | 1.21    | 12  | 1.92                            | 0.96         | 59.71    | 1.10    |
| 3   | 1.82                            | 0.98         | 65.58    | 1.17    | 13  | 1.85                            | 0.95         | 62.01    | 1.09    |
| 4   | 2.04                            | 0.96         | 59.85    | 1.17    | 14  | 1.87                            | 0.94         | 61.20    | 1.08    |
| 5   | 1.98                            | 0.98         | 59.16    | 1.15    | 15  | 1.61                            | 1.01         | 65.68    | 1.07    |
| 6   | 2.03                            | 0.96         | 58.46    | 1.14    | 16  | 1.89                            | 0.93         | 60.45    | 1.06    |
| 7   | 1.89                            | 1.00         | 60.66    | 1.14    | 17  | 1.95                            | 0.94         | 56.14    | 1.03    |
| 8   | 1.96                            | 0.98         | 59.14    | 1.13    | 18  | 1.85                            | 1.00         | 53.30    | 0.99    |
| 9   | 1.98                            | 0.96         | 59.33    | 1.13    | 19  | 1.73                            | 0.98         | 53.86    | 0.91    |
| 10  | 1.89                            | 1.00         | 58.86    | 1.12    | 20  | 1.64                            | 1.00         | 54.49    | 0.89    |

**Table S10.** Performance parameters of 4 % HBr-Cs<sub>2</sub>AgBiBr<sub>6</sub> PSCs.

| No. | $J_{sc}$ [mA cm <sup>-2</sup> ] | $V_{oc}$ [V] | $FF$ [%] | PCE [%] | No. | $J_{sc}$ [mA cm <sup>-2</sup> ] | $V_{oc}$ [V] | $FF$ [%] | PCE [%] |
|-----|---------------------------------|--------------|----------|---------|-----|---------------------------------|--------------|----------|---------|
| 1   | 1.99                            | 1.05         | 65.63    | 1.36    | 11  | 1.81                            | 1.05         | 62.48    | 1.19    |
| 2   | 2.01                            | 1.03         | 64.24    | 1.33    | 12  | 1.86                            | 1.01         | 62.54    | 1.17    |
| 3   | 2.03                            | 1.02         | 64.08    | 1.33    | 13  | 2.10                            | 0.97         | 57.02    | 1.16    |
| 4   | 2.05                            | 1.01         | 62.42    | 1.30    | 14  | 1.87                            | 0.95         | 64.83    | 1.16    |
| 5   | 1.84                            | 1.07         | 64.42    | 1.28    | 15  | 1.87                            | 0.99         | 59.96    | 1.11    |
| 6   | 1.81                            | 1.00         | 68.86    | 1.24    | 16  | 1.64                            | 0.99         | 68.20    | 1.10    |
| 7   | 2.02                            | 1.00         | 61.43    | 1.24    | 17  | 1.95                            | 0.97         | 58.22    | 1.10    |
| 8   | 1.81                            | 0.99         | 68.78    | 1.23    | 18  | 1.89                            | 0.97         | 59.45    | 1.10    |
| 9   | 2.08                            | 0.98         | 59.04    | 1.20    | 19  | 1.65                            | 0.99         | 66.81    | 1.09    |
| 10  | 1.74                            | 1.00         | 68.71    | 1.20    | 20  | 1.93                            | 0.96         | 58.63    | 1.08    |



**Table S11.** Performance parameters of 5 % HBr-Cs<sub>2</sub>AgBiBr<sub>6</sub> PSCs.

| No. | $J_{sc}$ [mA cm <sup>-2</sup> ] | $V_{oc}$ [V] | $FF$ [%] | PCE [%] | No. | $J_{sc}$ [mA cm <sup>-2</sup> ] | $V_{oc}$ [V] | $FF$ [%] | PCE [%] |
|-----|---------------------------------|--------------|----------|---------|-----|---------------------------------|--------------|----------|---------|
| 1   | 1.74                            | 0.91         | 51.50    | 0.82    | 11  | 1.82                            | 0.98         | 40.37    | 0.72    |
| 2   | 1.77                            | 0.99         | 46.12    | 0.81    | 12  | 1.51                            | 1.04         | 45.80    | 0.72    |
| 3   | 1.79                            | 0.99         | 44.41    | 0.79    | 13  | 1.37                            | 0.93         | 56.14    | 0.71    |
| 4   | 1.77                            | 0.99         | 43.61    | 0.76    | 14  | 1.37                            | 0.93         | 56.19    | 0.71    |
| 5   | 1.35                            | 0.93         | 59.99    | 0.75    | 15  | 1.40                            | 1.04         | 48.69    | 0.71    |
| 6   | 1.43                            | 0.92         | 55.77    | 0.74    | 16  | 1.10                            | 1.06         | 60.45    | 0.70    |
| 7   | 1.40                            | 1.04         | 50.30    | 0.73    | 17  | 1.47                            | 0.79         | 55.02    | 0.64    |
| 8   | 1.42                            | 0.92         | 55.45    | 0.73    | 18  | 1.37                            | 0.89         | 51.57    | 0.63    |
| 9   | 1.33                            | 0.93         | 58.53    | 0.73    | 19  | 1.21                            | 1.03         | 49.61    | 0.61    |
| 10  | 1.77                            | 0.99         | 41.35    | 0.72    | 20  | 1.38                            | 0.83         | 52.89    | 0.60    |

**Table S12.** Performance parameters of 1 % HI-Cs<sub>2</sub>AgBiBr<sub>6</sub> PSCs.

| No. | $J_{sc}$ [mA cm <sup>-2</sup> ] | $V_{oc}$ [V] | $FF$ [%] | PCE [%] | No. | $J_{sc}$ [mA cm <sup>-2</sup> ] | $V_{oc}$ [V] | $FF$ [%] | PCE [%] |
|-----|---------------------------------|--------------|----------|---------|-----|---------------------------------|--------------|----------|---------|
| 1   | 1.80                            | 0.76         | 34.80    | 0.48    | 11  | 1.39                            | 0.47         | 46.09    | 0.30    |
| 2   | 1.40                            | 0.54         | 48.11    | 0.36    | 12  | 1.40                            | 0.47         | 42.25    | 0.28    |
| 3   | 1.52                            | 0.52         | 44.57    | 0.35    | 13  | 1.66                            | 0.75         | 22.05    | 0.28    |
| 4   | 1.03                            | 0.89         | 38.28    | 0.35    | 14  | 1.52                            | 0.61         | 29.83    | 0.28    |
| 5   | 1.48                            | 0.48         | 47.52    | 0.34    | 15  | 1.41                            | 0.58         | 32.99    | 0.27    |
| 6   | 1.50                            | 0.51         | 44.35    | 0.34    | 16  | 1.41                            | 0.46         | 40.18    | 0.26    |
| 7   | 1.34                            | 0.48         | 51.23    | 0.33    | 17  | 1.69                            | 0.42         | 30.77    | 0.22    |
| 8   | 1.55                            | 0.62         | 32.94    | 0.31    | 18  | 1.66                            | 0.44         | 29.90    | 0.22    |
| 9   | 1.17                            | 0.79         | 33.89    | 0.31    | 19  | 1.08                            | 0.58         | 31.95    | 0.20    |
| 10  | 1.52                            | 0.66         | 30.43    | 0.31    | 20  | 1.03                            | 0.65         | 26.43    | 0.18    |

**Table S13.** Performance parameters of 2 % HI-Cs<sub>2</sub>AgBiBr<sub>6</sub> PSCs.

| No. | $J_{sc}$ [mA cm <sup>-2</sup> ] | $V_{oc}$ [V] | $FF$ [%] | PCE [%] | No. | $J_{sc}$ [mA cm <sup>-2</sup> ] | $V_{oc}$ [V] | $FF$ [%] | PCE [%] |
|-----|---------------------------------|--------------|----------|---------|-----|---------------------------------|--------------|----------|---------|
| 1   | 2.08                            | 0.84         | 44.44    | 0.78    | 11  | 1.53                            | 0.82         | 39.69    | 0.50    |
| 2   | 1.99                            | 0.83         | 44.07    | 0.73    | 12  | 1.50                            | 0.81         | 39.39    | 0.48    |
| 3   | 1.97                            | 0.82         | 42.87    | 0.70    | 13  | 1.49                            | 0.80         | 39.19    | 0.47    |
| 4   | 1.96                            | 0.82         | 41.81    | 0.67    | 14  | 1.49                            | 0.81         | 38.25    | 0.46    |
| 5   | 1.93                            | 0.80         | 39.84    | 0.62    | 15  | 1.03                            | 0.93         | 37.80    | 0.36    |
| 6   | 1.93                            | 0.85         | 37.56    | 0.62    | 16  | 1.03                            | 0.87         | 39.68    | 0.36    |
| 7   | 1.72                            | 0.83         | 38.21    | 0.55    | 17  | 1.09                            | 0.82         | 36.79    | 0.33    |
| 8   | 1.55                            | 0.83         | 42.48    | 0.54    | 18  | 1.13                            | 0.77         | 35.13    | 0.31    |
| 9   | 1.56                            | 0.84         | 41.68    | 0.54    | 19  | 0.93                            | 0.85         | 36.34    | 0.29    |
| 10  | 1.66                            | 0.83         | 38.42    | 0.53    | 20  | 1.07                            | 0.78         | 32.53    | 0.27    |

**Table S14.** Performance parameters of 3 % HI-Cs<sub>2</sub>AgBiBr<sub>6</sub> PSCs.

| No. | $J_{sc}$ [mA cm <sup>-2</sup> ] | $V_{oc}$ [V] | $FF$ [%] | PCE [%] | No. | $J_{sc}$ [mA cm <sup>-2</sup> ] | $V_{oc}$ [V] | $FF$ [%] | PCE [%] |
|-----|---------------------------------|--------------|----------|---------|-----|---------------------------------|--------------|----------|---------|
| 1   | 1.40                            | 0.97         | 44.51    | 0.61    | 11  | 1.81                            | 0.72         | 34.89    | 0.46    |
| 2   | 1.40                            | 0.97         | 44.74    | 0.60    | 12  | 1.66                            | 0.72         | 37.00    | 0.44    |
| 3   | 1.89                            | 0.79         | 38.68    | 0.58    | 13  | 1.76                            | 0.70         | 35.36    | 0.44    |
| 4   | 1.68                            | 0.83         | 39.51    | 0.55    | 14  | 1.05                            | 0.86         | 37.22    | 0.34    |
| 5   | 1.89                            | 0.77         | 37.35    | 0.54    | 15  | 0.87                            | 0.86         | 39.69    | 0.30    |
| 6   | 1.76                            | 0.79         | 38.58    | 0.53    | 16  | 1.19                            | 0.58         | 36.04    | 0.25    |
| 7   | 1.30                            | 0.92         | 43.70    | 0.52    | 17  | 1.20                            | 0.58         | 35.35    | 0.25    |
| 8   | 1.28                            | 0.91         | 44.36    | 0.52    | 18  | 1.25                            | 0.60         | 29.31    | 0.22    |
| 9   | 1.25                            | 0.95         | 43.53    | 0.52    | 19  | 1.09                            | 0.41         | 31.54    | 0.14    |
| 10  | 1.88                            | 0.73         | 36.04    | 0.49    | 20  | 1.47                            | 0.30         | 30.26    | 0.13    |

**Table S15.** The average photovoltaic parameters of Control, 4 % HCl-Cs<sub>2</sub>AgBiBr<sub>6</sub>, 4 % HBr-Cs<sub>2</sub>AgBiBr<sub>6</sub> and 2 % HI-Cs<sub>2</sub>AgBiBr<sub>6</sub> PSCs.

|         | $J_{sc}$ [mA cm <sup>-2</sup> ] | $V_{oc}$ [V] | $FF$ [%]     | PCE [%]     |
|---------|---------------------------------|--------------|--------------|-------------|
| Control | 1.54 ± 0.23                     | 0.96 ± 0.05  | 47.65 ± 5.55 | 0.70 ± 0.11 |
| 4% HCl  | 1.76 ± 0.36                     | 0.96 ± 0.07  | 57.54 ± 8.11 | 0.95 ± 0.13 |
| 4% HBr  | 1.90 ± 0.25                     | 1.00 ± 0.04  | 63.16 ± 4.95 | 1.20 ± 0.16 |
| 2% HI   | 1.53 ± 0.60                     | 0.83 ± 0.05  | 39.31 ± 5.13 | 0.50 ± 0.28 |

**Table S16.** Performance parameters of 0.77% H<sub>2</sub>O-Cs<sub>2</sub>AgBiBr<sub>6</sub> and 3.10% H<sub>2</sub>O-Cs<sub>2</sub>AgBiBr<sub>6</sub> PSCs.

| 0.77% H <sub>2</sub> O |                                 |              |          |         | 3.10% H <sub>2</sub> O |                                 |              |          |         |
|------------------------|---------------------------------|--------------|----------|---------|------------------------|---------------------------------|--------------|----------|---------|
|                        | $J_{sc}$ [mA cm <sup>-2</sup> ] | $V_{oc}$ [V] | $FF$ [%] | PCE [%] |                        | $J_{sc}$ [mA cm <sup>-2</sup> ] | $V_{oc}$ [V] | $FF$ [%] | PCE [%] |
| 1                      | 1.90                            | 0.93         | 44.72    | 0.79    | 1                      | 1.29                            | 0.94         | 53.25    | 0.65    |
| 2                      | 1.81                            | 0.94         | 46.69    | 0.79    | 2                      | 1.26                            | 0.98         | 51.15    | 0.64    |
| 3                      | 1.94                            | 0.92         | 43.35    | 0.77    | 3                      | 1.76                            | 0.99         | 36.10    | 0.63    |
| 4                      | 1.90                            | 0.92         | 43.68    | 0.77    | 4                      | 0.93                            | 1.06         | 61.79    | 0.61    |
| 5                      | 1.83                            | 0.93         | 45.06    | 0.77    | 5                      | 1.29                            | 0.94         | 48.78    | 0.59    |
| 6                      | 1.15                            | 1.03         | 60.53    | 0.70    | 6                      | 1.19                            | 1.04         | 44.77    | 0.55    |
| 7                      | 1.11                            | 1.04         | 58.82    | 0.68    | 7                      | 0.94                            | 0.99         | 57.95    | 0.54    |
| 8                      | 1.29                            | 0.94         | 53.25    | 0.65    | 8                      | 1.28                            | 0.99         | 40.83    | 0.52    |
| 9                      | 1.26                            | 0.98         | 51.15    | 0.64    | 9                      | 0.84                            | 1.00         | 60.40    | 0.51    |
| 10                     | 1.29                            | 0.94         | 48.78    | 0.59    | 10                     | 0.85                            | 1.04         | 53.96    | 0.48    |

**Table S17.** Five groups of pH values of 4% HBr-Cs<sub>2</sub>AgBiBr<sub>6</sub> and 4% HCl-Cs<sub>2</sub>AgBiBr<sub>6</sub> tested by pH meter.

|                                            | 1    | 2    | 3    | 4    | 5    | Average |
|--------------------------------------------|------|------|------|------|------|---------|
| 4% HBr-Cs <sub>2</sub> AgBiBr <sub>6</sub> | 1.83 | 1.85 | 1.84 | 1.83 | 1.80 | 1.83    |
| 4% HCl-Cs <sub>2</sub> AgBiBr <sub>6</sub> | 1.85 | 1.84 | 1.84 | 1.81 | 1.86 | 1.84    |

**Table S18.** Atomic ratios of Control and 4 % HBr-Cs<sub>2</sub>AgBiBr<sub>6</sub> films measured by XPS.

| Atomic [%] | C     | O     | Cs   | Ag   | Bi   | Br    |
|------------|-------|-------|------|------|------|-------|
| Control    | 44.26 | 17.11 | 9.15 | 3.77 | 2.44 | 23.27 |
| 4 % HBr    | 35.20 | 20.79 | 9.26 | 4.18 | 2.70 | 25.49 |

## Reference

1. G. Kresse and J. Furthmuller, *Comput. Mater. Sci.*, 1996, **6**, 15-50.
2. G. F. J. Kresse, *Phys. Rev. B: Condens. Matter Mater. Phys.*, 1996, **54**, 11169.
3. J. P. Perdew, A. Ruzsinszky, G. I. Csonka, O. A. Vydrov and K. Burke, *Phys. Rev. Lett.*, 2008, **100**, 136406.
4. Y. Kumagai, N. Tsunoda, A. Takahashi and F. Oba, *Phys. Rev. Mater.*, 2021, **5**, 123803.
5. Q. Zheng, Y. Xie, Z. Lan, O. V. Prezhdo, W. A. Saidi and J. Zhao, *Phys. Rev. B*, 2018, **97**, 205417.
6. Y. Shi, L. Zhang, S. Hu, X. Wang, J. Han, J. Huang, J. Chen, Y. Zhang, X. Zhang, J. He, H. Zuo, J. Ju, Z. Wu, W. Zhao, Y. Zeng, Y. Zou, K. Liao, R. Yang, W. Ye, Y. Gu, L. Gong, S. Fan, Z. Peng and J. Chen, *Chem. Eng. J.*, 2024, **492**, 152210.
